# Supplementary material for: A Novel miRNA in Rice Associated with the Low Seed Setting Rate Symptom of Rice Stripe Virus
Source: MDPI journal article supplement (doi:10.3390/ijms24043675), 2023-02-12
Supplement: s1 [file s1]

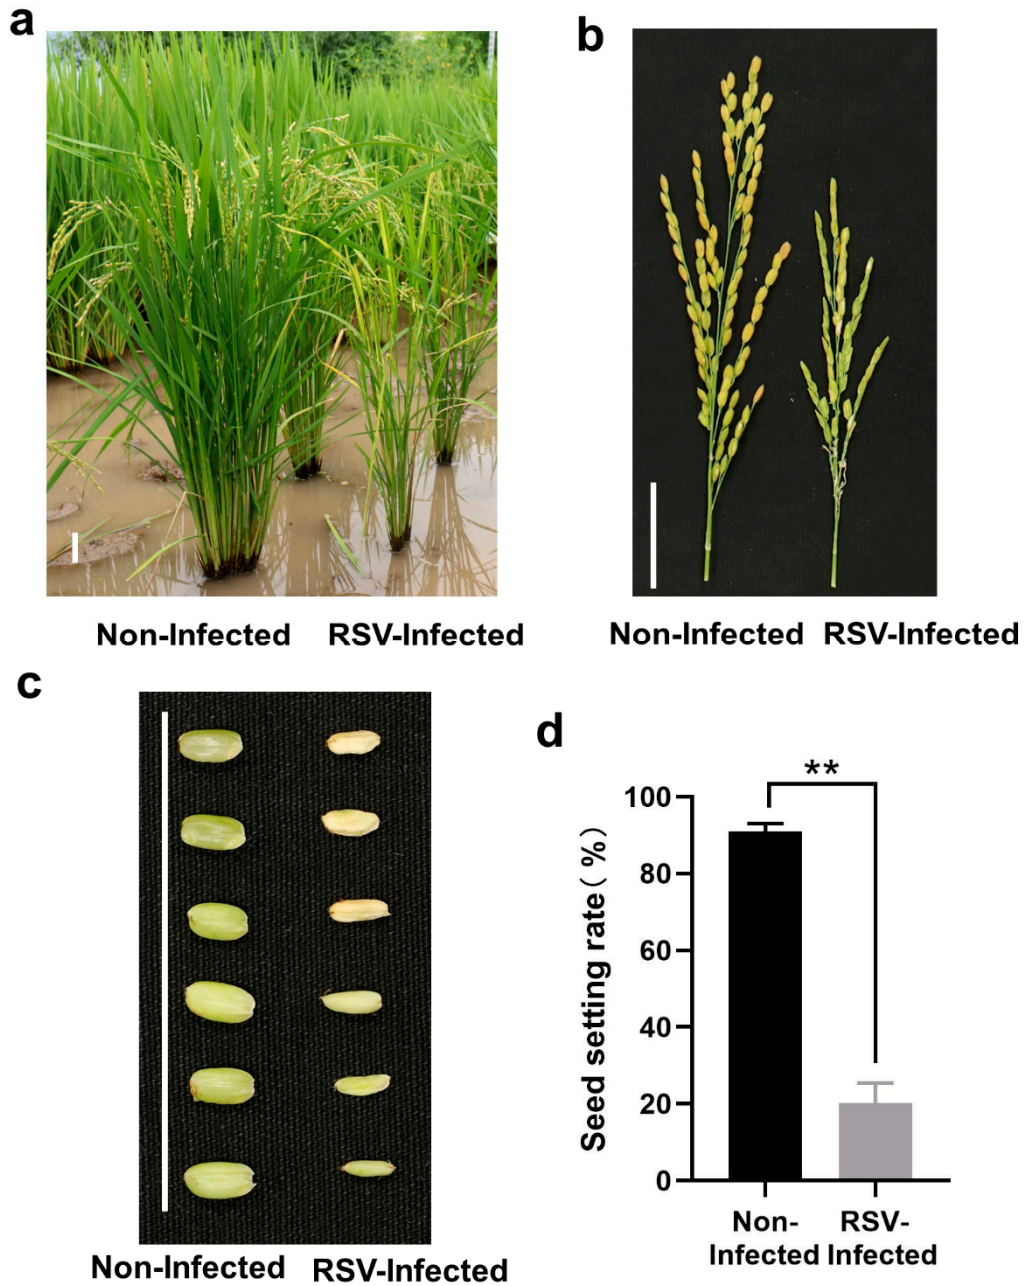

**Supplementary Figure S1 RSV infection caused the low seed setting rate of rice.** **(a)** Plants infected by RSV in the field. **(b and c)** Panicle (b) and seeds (c) of rice infected by RSV. **(d)** Seed setting rate of RSV-infected rice decreased significantly (\*\*,  $p < 0.01$ ). Values are means  $\pm$  SD. Student's  $t$  test was used to test the significance of the difference. Bars, 4 cm.

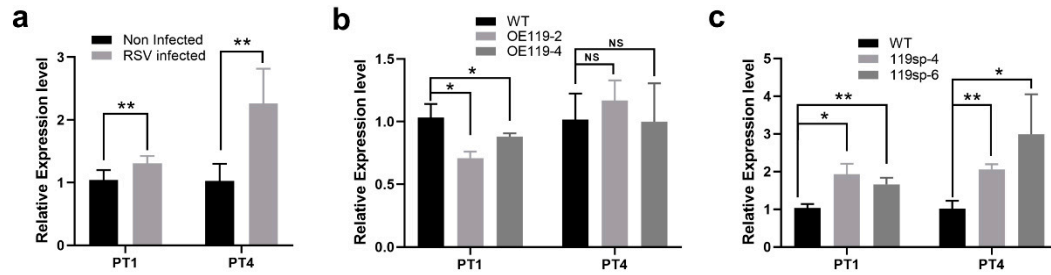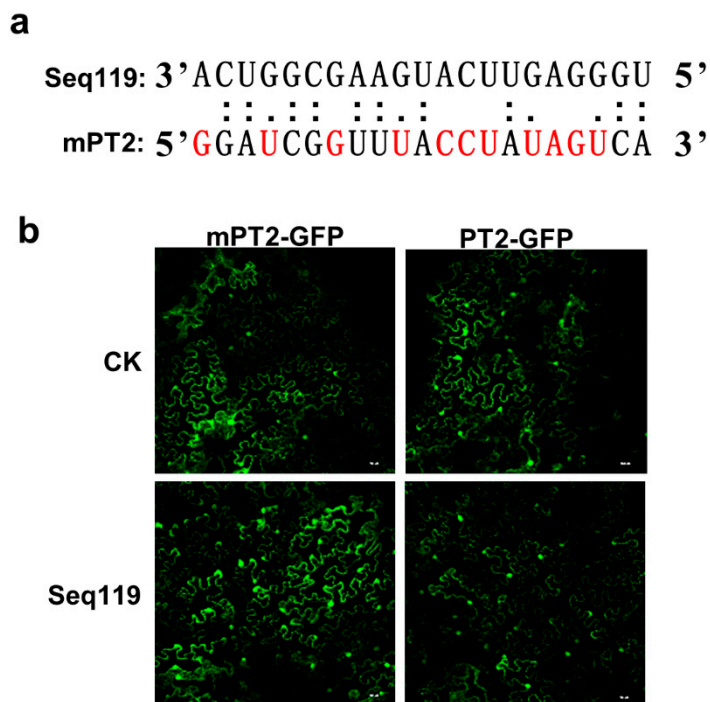

**Supplementary Figure S3 Analysis of the target of Seq119. (a)** the binding site was mutated on the PT2, producing mPT2 for analysis. The red letters indicate the changed nucleotides at the binding site of Seq119. **(b)** PT2-GFP or mPT2-GFP

were co-expressed with Seq119 for analysis in epidermal cells of *N. benthamiana*.

Confocal images were taken at 60 h after Agrobacterium infiltration. miR528 was used as control (CK).
