# Supplementary material for: A Novel miRNA in Rice Associated with the Low Seed Setting Rate Symptom of Rice Stripe Virus
Source: MDPI journal article supplement (doi:10.3390/ijms24043675), 2023-02-12
Supplement: s1 [file s1]

The sequences of target mimic

GAGCTCTGACCGCTTCAATCTGAACTCCCAAGCTTGACCGCTTCAATCTG  
AACTCCCAAGCTTGACCGCTTCAATCTGAACTCCCAAGCTTGACCGCTTC  
AATCTGAACTCCCAAGCTTGACCGCTTCAATCTGAACTCCCAAGCTTGAC  
CGCTTCAATCTGAACTCCCAAGCTTGACCGCTTCAATCTGAACTCCCAAG  
CTTGACCGCTTCAATCTGAACTCCCAAGCTTGACCGCTTCAATCTGAACT  
CCCAAGCTTGACCGCTTCAATCTGAACTCCCAGGATCC

The sequences of artificial Seq119 (overexpressing Seq119)

GAGCTCTTTGGCTGTAGCAGCAGCAGTGGGAGTTCATGAAGCGGTCACAGG  
AGATTCAGTTTGAAGCTGGACTTCACTTTTGCCTCTCTTGACCGCTTCATGAA  
CTCCCATTCCTGCTGCTAGGCTGTTCCGGATCC
